# **A urine-dependent human urothelial organoid offers a viable alternative to rodent models of infection**

Harry Horsley<sup>1</sup>, Dhanuson Dharmasena<sup>1</sup>, James Malone-Lee<sup>1</sup> and Jennifer L. Rohn<sup>1,2</sup>

<sup>1</sup> Chronic UTI Group, Centre for Nephrology, University College London, London, UK

<sup>2</sup> To whom correspondence should be addressed:

Chronic UTI Group, Centre for Nephrology, Division of Medicine, Royal Free Campus, University College London, Rowland Hill Street, London, United Kingdom, NW3 2PF  
j.rohn@ucl.ac.uk

## **Abstract**

Murine models describe a defined host/pathogen interaction for urinary tract infection, but human cell studies are scant. Although recent human urothelial organoid models are promising, none tolerate urine, the natural substrate of the tissue and of the uropathogens that live there. We developed a novel human organoid from progenitor cells which demonstrates the key structural hallmarks and biomarkers of the urothelium. After three weeks of transwell culture with 100% urine at the apical interface, the surface of the three-dimensional organoid differentiated into enlarged and flattened umbrella cells bearing characteristic tight junctions, asymmetric until membrane plaques, fusiform vesicles and a glycosaminoglycan layer. The umbrella cells also expressed apical cytokeratin-20, a spatial feature of the mammalian urothelium. Further experiments showed that urine itself is necessary for full development, and that undifferentiated cells are urine-tolerant despite the lack of membrane plaques and a glycosaminoglycan layer. Infection with *Enterococcus faecalis* revealed the expected invasive outcome, including urothelial sloughing and the formation of intracellular colonies similar to those previously observed in patient cells. This new biomimetic model could help illuminate invasive behaviours of uropathogens in the human system, and serve as a reproducible test bed for disease formation, treatment and resolution in patients.

## **Introduction**

UTIs are amongst the most common infectious diseases worldwide, but despite being associated with substantial economic and human cost <sup>1,2</sup>, they are grossly understudied relative to other human diseases. UTI pathogens are also of particular concern in the global antibiotic resistance crisis, so their burden will only increase in the future <sup>3</sup>. Recurrence of infection even after antibiotic treatment is a particularly troublesome aspect of UTI, usually involving the same strain implicated in the first infection <sup>1,4</sup>. For example, among healthy young women who suffer from their first UTI, the risk of recurrence within 6 months is 24% <sup>2</sup>. If they had a history of one or more UTIs, the likelihood of recurrence rises to 70% in that same year <sup>2</sup>. In the Canadian surveillance study, 14% of the 30,851 residents with UTI had more than one episode during the two-year study period, and 2% had six or more episodes <sup>5</sup>. These findings suggest that current treatment regimens are not ideal.

UTI is also problematic in more vulnerable subgroups: the risk of UTI dramatically increases in people with multiple sclerosis (MS) <sup>6,7</sup>, spinal injury <sup>8</sup>, renal transplant patients <sup>9</sup> and anyone requiring urinary catheterization or other indwelling devices <sup>10</sup>. In fact, UTIs have accounted for 10.5 million ambulatory care visits in 2007 in the United States <sup>11</sup>, with the direct and indirect costs being estimated at more than US\$3.5 billion. This is likely to rise with the ageing global population and the emerging threat of antibiotic resistance. Finally, amongst the elderly, UTIs are one of the most commonly diagnosed infections, accounting for over a third of all nursing home-associated infections <sup>12</sup>. More frequent UTI in these cohorts is not merely bothersome; UTI is known to exacerbate MS <sup>13</sup>, lead to confusion and falls in the elderly <sup>14</sup>, and increase the risk of organ rejection in renal transplant patients <sup>15</sup>. Furthermore, catheter-associated UTI carries an increased risk of urosepsis <sup>16</sup>, and bacteriuria in pregnant women is associated with preterm birth and other maternal morbidities <sup>17</sup>.

To understand why urinary infections are often recalcitrant to treatment, the pathogens must be studied in their unique environment. The urinary bladder is lined by a specialised transitional urothelium comprising 3-7 layers of cells: basal cells (above the basement membrane), intermediate cells (above basal cells) and morphologically distinct, highly specialised, often binucleated umbrella cells at the apical surface, which face outward into the bladder lumen <sup>18</sup>. These enlarged, flattened urothelial umbrella cells (or ‘facet cells’) partition urine and are thought to act as a powerful barrier to protect underlying tissue from harmful

waste compounds <sup>19</sup>. They elaborate a highly-durable apical asymmetric unit membrane (AUM) consisting of thousands of regularly arrayed plaques or ‘facets’ approximately 16.5 nm across made up of four mannosylated transmembrane glycoproteins called uroplakins (UP) <sup>19-21</sup>.

In addition to the uroplakin family, the urothelium also elaborates a mucopolysaccharide-rich layer of glycosaminoglycans (GAG) which are believed to protect the bladder from infection and urine-born irritants <sup>22</sup>, of which chondroitin sulphate, heparan sulphate, hyaluronic acid, dermatan sulphate and keratin sulphate are the most studied <sup>23</sup>. Chondroitin sulphate, in particular, is believed to play a key role in urothelial barrier function and exhibits luminal and basal expression in both human and porcine bladders <sup>24</sup>. In contrast, only heparan sulphate was detected in the luminal portion of calf bladders, elucidating possible differences between species <sup>25</sup>.

A significant proportion of research on the urothelium has been conducted using mouse models <sup>21,26</sup>. These findings have been widely translated into human oncology to locate the primary origin of metastatic tumours <sup>27</sup> and to understand the biology of UTI <sup>26</sup>. While invaluable in many cases and necessary for regulatory approval of drugs, some animal models of human disease, the majority of which are murine, have received widespread criticism in recent years <sup>28-32</sup>. The limitations of murine models are particularly evident when modelling human infection and attempting to treat this induced pathology with novel antimicrobials <sup>28</sup>. In such studies, mice are frequently infected with far higher quantities of log-phase bacteria than would be evident in a slow-growing chronic human infection, and the pharmacokinetic profiles of a given drug are challenging to translate to humans <sup>28,33</sup>.

In the case of urinary infection studies, it is known that the human and mouse bladder urothelium differ in a number of structural ways. The markers expressed are similar, but in contrast to the murine model, human bladder urothelial marker expression exhibits a relationship with the level of cellular differentiation <sup>21,34</sup>. For example, the healthy human bladder has been shown to elaborate cytokeratin 20 at the luminal surface whereas cytokeratin 8 is expressed throughout the cells of the urothelium <sup>18,35</sup>. The incorrect spatial expression of cytokeratin 20 by terminally differentiated umbrella cells has been linked to painful bladder syndrome and neurogenic bladder and is thought to predispose people with MS to chronic UTI <sup>6,18,35</sup>. Studies also suggest that murine and human bladders can differ in

their innate immune response to uropathogens (for example in their expression and use of Toll-like receptors <sup>36</sup>). Moreover, rodent bladders differ from those of humans functionally. While larger mammals (>3Kg) share a scalable urinary capacity and consistent voiding duration, rodents urinate almost constantly, bringing into question whether their bladders are a true storage organ <sup>37</sup>. The multiple disparities between the rodent and human bladders raise the possibility that relying so heavily on the former could be problematic for understanding UTI in the latter. Indeed, we have recently shown that the host/pathogen interactions of two common uropathogens, *E. coli* and *Enterococcus faecalis* (*E. faecalis*), seem to differ between mice and chronically infected older patients <sup>38</sup>, although it is not clear whether this is due to the model or the older patient group.

Given these species differences, there is a need for alternative human-based models to augment the impressive body of elegant *in vivo* mouse experiments into UTI biology. Human bladder cancer cell lines grow readily and are tractable, but they are genetically abnormal and, therefore, bear little resemblance to primary urothelial cells in terms of structure and function. In particular, although some retain the ability to form a stratified organoid, they do not form an organised and differentiated 3D architecture <sup>39,40</sup>, which is crucial not least for understanding host/pathogen interaction, as uropathogens are proposed to invade the urothelium via binding to factors only present in terminally differentiated umbrella cells <sup>26</sup>.

On the other hand, recent years have seen advances in three-dimensional tissue engineering. A number of promising 3D urothelial models have been described in the literature, the majority of which have been discussed in a comprehensive review by Baker *et al.* (2014) <sup>22</sup>. Briefly, existing bladder models are produced using one of three broad culture techniques: (1) organ culture of intact biopsies or explant culture; (2) culture of urothelial cells naturally shed into the urine or harvested from biopsies; and (3) organotypic culture whereby normal urothelial cells are stimulated to form 3D organoids on filter inserts <sup>22</sup>. Although arguably the most relevant model system, organ culture of intact human tissue is time consuming, yields a finite amount of experimental material and requires fresh human tissue <sup>22,41</sup>. Due to these limitations, a number of researchers have used rodent bladder biopsies. However, inter-species differences imply that these models may not be biologically germane <sup>42</sup>. More practical is the cultivation of human urothelial cells isolated from host urine or biopsies which, when grown using a specialist protocol, have been shown to maintain the ability to stratify, differentiate and develop a robust barrier function *in vitro* <sup>22,43-46</sup>.

Although these models constitute impressive alternatives to animal models, to our knowledge, none last more than a few hours in urine *in vitro*<sup>22</sup>, the natural apical substrate of this tissue. Therefore, the effect of urine exposure on urothelial differentiation and GAG expression remains unclear. Moreover, none of the human-derived urothelial biomimetics have been reported to correctly express cytokeratin 20 at the apical surface<sup>35</sup>. To address these limitations, we worked to develop a urine-tolerant organotypic human urothelium that could be used as a platform studying for host/uropathogen interactions, treatment, and resolution in humans.

## **Materials and methods**

### **Human Primary progenitor cell expansion and handling in 2D**

Commercially available human bladder epithelial progenitor cells (HBEP, Cell N Tec)<sup>47</sup> and their spontaneously immortalised, non-transformed counterparts (HBLAK, Cell N Tec) were supplied in frozen aliquots containing  $\sim 5 \times 10^5$  cells at passage 2 and  $\sim 0.5 \times 10^5$  at passage 25 respectively. Cells were isolated from bladder trigone biopsies from male patients undergoing surgery for benign prostatic hyperplasia. HBEP cells are guaranteed to grow for a further 15 population doublings before senescing whereas HBLAK cells, although spontaneously immortalised, should not be differentiated into 3D cultures once they have exceeded a passage number of 40-50. Both cell types were cultured identically, with the exception of slight differences in incubation time between passages, due to the slightly increased rate of cell division exhibited by HBLAK cells.

Thawed cells were seeded ( $\sim 300$  cell clumps /  $\text{cm}^2$ ) into pre-warmed and equilibrated low-calcium, high-bovine pituitary extract, primary epithelial medium (CnT-Prime, Cell N Tec) in 9cm polystyrene dishes and incubated at  $37^\circ\text{C}$  in a humidified incubator under 5%  $\text{CO}_2$ . Culture medium was replaced after overnight incubation to remove residual dimethyl sulfoxide (DMSO). Antibiotics were not added to culture medium at any point due to adverse effects on cytodifferentiation, metabolism and morphology<sup>48</sup>. Furthermore, trypsin is known to damage primary cells, so Accutase solution (Innovative Cell Technologies) was used to detach cells at all stages of experimentation<sup>49</sup>. Cells were allowed to expand to  $\sim 70\%$  confluency before freezing batches of cells at a density of  $\sim 1 \times 10^6$  cells/ml in defined freezing medium (CnT-CRYO-50, Cell N Tec) in preparation for later experiments. Cells were not allowed to become fully confluent during cell expansion in an effort to maintain a proliferative phenotype.

### **Differentiation of 3D human urothelium *in vitro***

In preparation for organotypic culture, previously frozen progenitor cells were thawed and expanded on 9cm culture dishes as above. Once 70-80% confluent, the cells were washed briefly with calcium- and magnesium-free phosphate buffered saline (PBS, Sigma-Aldrich) and incubated at  $37^\circ\text{C}$  in  $\sim 3\text{ml}$  of pre-warmed Accutase solution for 2-5min. The dishes were

lightly tapped and detached cells re-suspended in 7ml of warm CnT-Prime. After centrifugation at 200xg for 5min, the supernatant was removed and the pellet re-suspended in fresh CnT-Prime. This cell suspension was counted whilst allowing the cells to equilibrate for 3min at room temperature.  $2 \times 10^5$  cells in 400 $\mu$ l of CnT-Prime (internal medium) were added to 6 12mm 0.4 $\mu$ m pore polycarbonate filter (PCF) inserts (Millipore) standing in 6cm culture dishes containing ~3ml of fresh pre-warmed CnT-Prime medium (external medium, level with insert filters). A further 8ml of CnT-Prime medium was added to the 6cm dish (external to the filter inserts) until internal and external fluid levels were the same. The 3D culture inserts were incubated for 3-5 days until 100% confluent. Confluency was determined through the fluorescent staining of 1 insert and visualisation under epi-fluorescence microscopy (see section below). Once deemed confluent, internal and external medium was removed and replaced with low-BPE, calcium-rich (1.2mM) differentiation barrier medium (CnT-Prime-3D, Cell N Tec) to promote differentiation. Subsequent to overnight incubation, the internal medium (apical surface of cell culture) was removed and replaced with filter-sterilised human urine pooled from healthy volunteers of both genders to aid terminal differentiation into umbrella cells. The external CnT-Prime-3D medium and the internal human urine were replaced every 3 days and the culture incubated for 14-24 days at 37°C in 5% CO<sub>2</sub>.

To explore the effect of urine on differentiation in 2D, the HBLAK cells were seeded on 8-well permanox Lab-Tek slides (Sigma-Aldrich) and grown to confluency. The cells were then exposed to CnT-Prime-3D medium alone, 25%, or 50% sterile human urine diluted in CnT-Prime-3D for 72 hours at 37°C in 5% CO<sub>2</sub>. To analyse the effect of urine on HBLAK organoid formation, cells were grown to confluency on filter inserts as above. The basal compartment was treated with CnT-Prime-3D throughout, however, the apical compartment was filled with either CnT-Prime-3D alone, 50% sterile human urine diluted in CnT-Prime-3D or 100% urine. The specified medium or urine was changed every 3 days and the culture incubated for 14 days at 37°C in 5% CO<sub>2</sub>.

### **Characterisation of the 3D urothelium**

Prior to fluorescent staining and immunofluorescence (IF), filter inserts were carefully transferred to 8-well plates (Nunc) and submerged in 4% methanol-free formaldehyde (Thermo Scientific, Fisher Scientific) in PBS overnight at 4°C. After fixation, the filter

inserts were kept at 4°C in 1% formaldehyde in sealed containers in preparation for processing.

To determine confluency and analyse morphology, the pre-fixed tissue was permeabilised in 0.2% Triton-X100 (Sigma-Aldrich) in PBS for 15 minutes at RT followed by a single wash with PBS. The cells were stained with TRITC or Alexa Fluor-633-conjugated phalloidin (0.6µg/ml)(Sigma-Aldrich), to label filamentous actin, and the DNA stain 4',6-diamidino-2-phenylindole, (DAPI, 1µg/µl; Sigma-Aldrich) in PBS for 1 hour at RT. The dual-labelling solution was gently aspirated and the cells washed 5 times in PBS.

For indirect IF, the tissue was permeabilised as above, washed with PBS then blocked with 10% normal goat serum (NGS, Thermo Fisher) in PBS for 1 hour. Tissue was incubated overnight at 4°C with primary antibodies in PBS containing 1% NGS as follows: 1:10 dilution of mouse anti-uropod-III (UP3) monoclonal antibody (clone AU1, 651108, Progen Bioteknik); 1:50 dilution of mouse anti-Cytokeratin 8 (CK8) monoclonal antibody (clone H1, MA1-06317, Thermo Fisher); 1:100 dilution of rabbit anti-Cytokeratin 20 (CK20) polyclonal antibody (PA5-22125, Merck Millipore); 1:200 dilution of rat anti-muscarinic acetylcholine receptor m2 (M2) monoclonal antibody (clone M2-2-B3, Merck Millipore); 1:200 dilution of rabbit anti-muscarinic acetylcholine receptor m3 (M3) polyclonal antibody (ab126168, Abcam); 1:100 dilution of mouse anti-chondroitin sulphate monoclonal antibody (clone CS-56, ab11570, Abcam) or 1:100 dilution of rat anti-heparan sulphate proteoglycan (large) monoclonal antibody (clone A7L6, ab2501, Abcam). Post incubation with primary antibodies, the tissue was washed 5 times with PBS containing 1% NGS then incubated at RT for 1 hour with a 1:250 dilution of the following secondary antibodies (depending on the species of primary antibody used): goat anti-mouse, goat anti-rabbit or goat anti-rat conjugated to either Alexa Fluor-555, Alexa Fluor-488 or Alexa Fluor-633 (Invitrogen). Labelled cells were washed 5 times with PBS to remove unbound secondary antibody before staining with phalloidin and DAPI as above. In some experiments, prior to permeabilization, cell plasma membranes were labelled with 1µg/ml wheat germ agglutinin (WGA) conjugated to Alexa Fluor-488/633 (Invitrogen) in Hank's balanced salt solution (HBSS, Invitrogen) for 20min at RT. Controls were performed by using primary and secondary antibodies in isolation.



In preparation for imaging, filters were carefully removed from inserts using a scalpel, mounted with FluorSave reagent (Calbiochem), and a coverslip fixed in place with clear nail varnish. Lab-Tek slide wells and gaskets were carefully removed prior to the addition of FluorSave and a coverslip as above.

## **Electron microscopy**

Electron microscopy was conducted by the Division of Medicine, University College London electron microscopy unit at the Royal Free Campus, Hampstead, London.

For transmission electron microscopy (TEM), samples were fixed in Karnovsky's fixative (2.5% glutaraldehyde / 2% paraformaldehyde) and then washed in 1M PBS 3x10 min, followed by a post-fixation in 1% Osmium tetroxide for 1 hour at room temperature. Tissue was rinsed with distilled water 3x10 min. Samples were dehydrated in an ethanol series (30, 50, 70, 90 and 100%) then treated with resin-ethanol (1:1) overnight. Subsequently, samples were embedded in 100 % LEMIX resin and incubated at 65°C for 24 hours. Ultra-thin sections of the resin block were cut and post stained with 2% Uranyl acetate and Lead citrate.

For scanning electron microscopy (SEM), the samples were fixed and dehydrated as above. Samples were then incubated in Tetramethylsilane for 10 min and air dried before mounting on stubs and sputter-coated with gold.

## **Experimental infection of the human urothelial organoid**

A single strain of *Enterococcus faecalis* (*E. faecalis*) originally derived from a patient with chronic UTI<sup>38</sup> along with uropathogenic *Escherichia coli* (*E. coli*) shown previously to be invasive in murine models (UTI89, kindly donated by the Hultgren laboratory, Washington University, St. Louis), were grown aerobically in a shaking incubator at 37°C for 24 hours. Once a batch of 6 HBLAK 3D urothelial cultures had reached 14 days of growth,  $1.1 \times 10^5$  colony-forming units of each bacteria were added to the filter-sterile human urine at the apical liquid-liquid interface of each culture. The experimentally infected cultures were incubated for 2 hours at 37°C under 5% CO<sub>2</sub>. The 3D culture filter inserts were washed with PBS before fixation and staining as above.

## **Imaging and Analysis**

We performed epi-fluorescence microscopy on an Olympus CX-41 upright microscope, and confocal laser scanning microscopy on Leica SP5 and SP2 microscopes. Images were processed and analysed using Infinity Capture and Analyze V6.2.0, ImageJ 1.50h<sup>50</sup> and the Leica Application Suite, Advanced Fluorescence 3.1.0 build 8587 Software.

TEM was conducted using a Jeol 1200-Ex digital image capture system with a side mount 2Kv AMT camera. SEM was performed using a Jeol JSM-5300 fitted with a Semafore digital image capture system.

## **Results**

### **HBLAK and HBEP can form morphologically correct urothelial organoids**

HBEP cells were derived from normal human bladder biopsies by CellNTec and provided commercially in cryovials. We also grew HBLAK cells, which are spontaneously immortalised but not transformed version of HBEP available from the same company. These latter cells retain the ability to differentiate but have increased longevity without senescing. On thawing, both cell types were seeded on plastic in fully defined, serum-free, BPE containing CNT-Prime media, which favours the proliferative phenotype. Both HBEP and HBLAK shared a 'spindle-like' morphology, a hallmark of multipotent epithelial progenitors. When 70% confluent, the cells were transferred to Millicell transwells (Millipore) with CNT-Prime media in the apical and basal chambers and grown to confluency. At this point, the media was shifted to high-calcium, differentiation media (CNT-Prime-3D) in both chambers. After overnight incubation, we replaced filter-sterilized human urine in the apical chamber and left the cultures to develop for 14 (HBLAK) to 25 (HBEP) days depending on the experiment, with periodic media and urine changes. At endpoint, the organoid-coated filters were retrieved, fixed, and stained for various biomarkers and inspected microscopically.

3D confocal analyses showed that both cultures were viable despite the prolonged presence of urine. The HBEP tissue was morphologically reminiscent of normal human urothelium, containing multiple layers (approximately 3) with tightly-packed spheroid basal cells, intermediate cells and enlarged and flattened umbrella cells at the apical surface (FIG 1 a,b). The HBLAK tissue was also morphologically similar to native human urothelium, but in contrast, likely due to increased rate of growth, these produced approximately 5-7 cell layers with multiple layers of intermediate cells (FIG 1 c,d). Optical slices at the basal region of the HBEP and HBLAK organoids respectively showed the typically small, tightly-packed and spheroid morphology of urothelial basal cells (FIG 1 e,g). Basal cells in the HBLAK organoid ( $\sim\phi 10\mu\text{m}$ ) appeared to be slightly smaller than those in the HBEP culture ( $\sim\phi 20\mu\text{m}$ ) (FIG 1 e,g). Similarly, single optical slices at the apical regions of the HBEP and HBLAK organoids showed the formation of a large, flat and often hexagonal cellular morphology typical of well-differentiated umbrella cells (FIG 1 f,h) which were occasionally binucleate (data not shown).

In summary, both models are morphologically similar to native human bladder tissue and formed well-differentiated umbrella cells at their apical surface. Moreover, both models were exposed to sterile human urine for several weeks (14-25 days) without exhibiting any signs of toxicity.

### **HBLAK and HBEP organoids exhibit key biomarkers of the human urothelium**

We characterised the HBEP and HBLAK human urothelial organoids further by targeting urinary tract-specific antigen expression using indirect IF in conjunction with high-resolution laser scanning confocal microscopy. The resulting organoids had the correct spatial expression of several key biomarkers. Studies exploring cytokeratin (CK) expression in normal human bladders have shown a relationship between the level of cytodifferentiation and sub-type CK expression<sup>18</sup>. Both HBEP- and HBLAK organoids exhibited correct spatial expression of CK8 and CK20; specifically, CK8 was expressed throughout the strata of the *in vitro* tissues whereas CK20 was expressed preferentially by the umbrella cells at the apical surface (FIG 2 a,b,c,d). In contrast to the rodent bladder, muscarinic receptors are expressed throughout the human urothelium<sup>51,52</sup>. This finding was echoed in our model with evidence of muscarinic receptors M2 and M3 expressed in all cell layers of both organoids (FIG 2 e,g). Uroplakin-III (UP3), an indispensable part of the asymmetric unit membrane<sup>53</sup>, was present at the apical surface of the HBEP (FIG 2 f) and HBLAK (Fig 2 h), in a pattern similar to that previously reported by our group in shed urothelial cells from infected patients<sup>39</sup>.

### **HBLAK organoids possess correct topographical and ultrastructural features**

Given these promising results, we developed the more tractable and thicker HBLAK urothelial mimetic model, using scanning electron microscopy (SEM) and transmission electron microscopy (TEM) to analyse its ultrastructure, organisation and overall topography. Low-power SEM showed that the HBLAK cells elaborated distinct multi-layered ‘islands’ of organoid formation with umbrella cells at their surface surrounded by undifferentiated basal cell-like monolayers (FIG 3 a). The surface of each ‘island’ exhibited very large (up to ~80µm), often hexagonal umbrella cells; however, areas of disorganised hyperplasia were often noted (FIG 3 b). On closer inspection, SEM micrographs showed evidence of tight junction formation (FIG 3 c)<sup>54</sup> and characteristic microplicae or ‘hinges’ at the apical surface of each umbrella cell (FIG 3 d)<sup>54,55</sup>. Orthogonal sections of the fully differentiated organoid

‘islands’ were analysed using TEM. As with the laser scanning confocal imaging, TEM elucidated distinct layers of basal, intermediate and umbrella cells (FIG 3 e). Rigid plaques could be seen residing between the ‘hinges’ at the apical surface of the umbrella cells (FIG 3 f) <sup>54,55</sup> along with the specialised fusiform vesicles (FIG 3 g) necessary for trafficking uroplakins <sup>56</sup>. In contrast, TEM analysis of the small undifferentiated cells making up the monolayers surrounding the organoid ‘islands’ did not exhibit hinges, plaques or fusiform vesicles (FIG 3 a,h,i). Taken together, these observations suggest that the fully differentiated ‘island’ regions of the organoids possess the key features expected of a human urothelium.

### **Urine strongly influences HBLAK differentiation, organoid development and GAG formation**

As shown above, the HBLAK organoid expresses key urothelial markers and is morphologically reminiscent of native human urothelium. Of significant importance, however, is the tolerance exhibited by these cultures to urine. In this group of experiments we investigated whether urine is merely tolerated or indeed necessary for differentiation in 2D, organoid formation and the elaboration of a GAG layer. To achieve this, we exposed the cells, in 2D and 3D, to various dilutions of sterile human urine before examining microscopically.

When grown as 2D monolayers on chamber slides, the HBLAK cells exhibited a marked dose response to urine after 72 hours. Cells grown in high calcium medium alone took on a small, tightly packed basal cell-like appearance with well-formed intercellular junction (FIG 4 a). With the addition of 25% human urine a small proportion of the cells began to differentiate and exhibit a large umbrella cell-like morphology, but intercellular junctions were partially disrupted (FIG 4 b). After 72 hours in 50% sterile human urine, extensive colonies of HBLAK cells took on a large, flat umbrella cell morphology. However, intercellular junctions were shown to be almost entirely compromised, possibly because increased urine came at the expense of calcium concentration (FIG 4 c).

Strikingly, we found human urine to be necessary for organoid formation and the elaboration of a GAG layer in HBLAK cells. Cells cultured for 14 days on filter inserts with high calcium medium in the basal and apical compartments showed no stratified organoid formation, little heparan sulphate, and no detectable expression of chondroitin sulphate (FIG 4 d). Moreover,

these cells appeared to exhibit a degree of anaplasia, by dedifferentiating into a more ‘spindle-like’ multipotent progenitor cell-like morphology (FIG 4 d, and data not shown). In contrast, HBLAK cells cultured in 50% or 100% human urine at the apical surface produced ‘islands’ of organoid formation between 3 and 6 cell layers thick (FIG 4 e,f). Furthermore, both urine dilutions stimulated the expression of a heparan and chondroitin sulphate-rich GAG layer at the urine-umbrella cell interface (FIG 4 e,f). Taken together with the data in Figure 3, these experiments show that urine is an indispensable effector of full urothelial differentiation in this model. Nevertheless, despite a lack of GAG layer and AUM, undifferentiated cells remain viable for long periods in urine, which suggests that these “barriers” are not required for urine tolerance.

### **The HBLAK organoid is a promising model for infection, including cell invasion**

Thus far we have characterised the HBLAK-derived human urothelial organoids and highlighted similarities to native human tissue. In addition, we found that human urine, the natural apical substrate of the urothelium, evokes a physiological response which would appear to be vital for stratification, differentiation and the elaboration of a GAG layer. Next, we challenged the organoid with known uropathogens to better understand the infective process and to further validate this novel system as a test-bed for the study of host/pathogen interactions.

First, we infected the HBLAK organoid with patient-isolated *E. faecalis*<sup>38</sup>. *E. faecalis* is commonly implicated in chronic UTI and is frequently associated with multi-drug resistance, hospital-acquired infection, and catheter associated biofilm formation; we previously demonstrated that it exhibits intracellular invasion in patient cells<sup>38,57-64</sup>. When we inspected the cultures two hours after infection, we found that *E. faecalis* exhibited robust tropism in this model, with the resulting adherent colonies relatively loosely packed (FIG 5 a). As with human patients suffering from acute and chronic UTI<sup>38</sup>, the umbrella cell layer was shed in response to bacterial insult, leaving an uneven surface of basal and intermediate cells (FIG 5 a). Inspection of supernatants post-infection revealed extensive shed umbrella cells highly reminiscent of those seen in the urine of infected patients. Significantly, in the tissue that remained, we saw frequent examples of large intracellular bacterial colonies (FIG 5 b,c,d) within the superficial layer of cells, similar in morphology to those we previously observed in

material from patients<sup>38</sup>. These findings suggest that the model recapitulates the host/pathogen interaction of *E. faecalis* with its human host.

Next, we infected the HBLAK organoid with a strain of uropathogenic *E. coli* previously shown to be invasive in murine studies (UTI89). This bacteria exhibited marked tropism in this system with extracellular biofilm formation covering a significant proportion of the model (FIG 5 e). As seen in patients, and in the *E. faecalis* infected organoid described above, the umbrella cell layer was sloughed, resulting in an irregular stratum of basal and intermediate cells (FIG 5 e). This cell shedding appeared to allow the bacteria to gain access to deeper tissue layers where it could be seen residing extracellularly between basal and intermediate cells (FIG 5 f,g,h). In contrast to *E. faecalis*, however, despite the examination of numerous samples, we found no evidence of intracellular *E. coli* (FIG 5 f,g,h). This lack of intracellular invasion, in conjunction with extensive superficial biofilm behaviour, again echoes what we previously showed in shed patient cells and human T24 cell models<sup>38</sup>.

In summary, this model, to our knowledge, represents the first urine-tolerant human bladder organoid produced *in vitro*. This tissue is morphologically similar to normal human bladder urothelium and expresses a number of key markers in the correct spatial compartments in response to exposure to urine. As with patients, this organoid rapidly sheds the umbrella cell layer in response to bacterial insult. Moreover, *E. faecalis* and *E. coli* displayed phenotypes supporting our previous findings in shed patient cells<sup>38</sup>.

## **Discussion**

The development and use of *in vitro* human tissue mimetics is thought to be accelerating the drug discovery process<sup>65</sup> and improving our understanding of human tissue morphogenesis. Due to improved physiological relevance, such models could even reduce the use of animal models in the coming years<sup>66</sup>. Here, we present a urine-tolerant, three-dimensional urothelial organoid derived from human progenitors that is easy to grow from commercially-sourced, quality-controlled materials, displays key hallmarks of the human urothelium, and may serve as an alternative to the murine model. If desired, it should also be possible to create similar urine-tolerant organoids from fresh human biopsies using the protocols and defined medium we describe.

Morphologically, the HBEP and HBLAK cells produced tissue reminiscent of what is described in the human bladder<sup>18,19,26</sup>. Moreover, both culture types developed a fully differentiated umbrella cell layer, a hallmark of the bladder urothelium<sup>21</sup>. HBEP cells produced tissue ~3 cell layers thick whereas HBLAK cell-derived tissue elaborated ~5-7 layers. In contrast to mice, higher mammals such as humans have multiple intermediate cell layers, a feature which may favor the use of HBLAK cells<sup>21</sup>. However, rate of cell division could have played a role in this outcome, as could cell senescence in the HBEP population<sup>67</sup>. Further work is needed to understand how tissue thickness is regulated in both cell types.

Phenotypic analysis of both the HBEP and HBLAK urothelial organoid tissue elucidated the presence of some important urothelial markers. Uroplakins are a group of highly conserved glycoproteins which are unique to mammalian urothelium<sup>53</sup>. Uroplakin-III (UP3) was expressed throughout the HBEP-derived tissue and its expression was morphologically indistinguishable from our patient-shed urothelial cells<sup>38</sup>. Laguna *et al.* (2006)<sup>18</sup> found that the normal human urothelium expresses a range of cytokeratins in relation to the level of cytodifferentiation. Our 3D culture mimicked these findings with cytokeratin-8 (CK8) found throughout the tissue and cytokeratin-20 (CK20) being a preferential phenotype of well-developed umbrella cells<sup>18</sup>. To our knowledge, this is the first human bladder organoid demonstrating the correct spatial expression of CK20<sup>35</sup>.

Patients with overactive bladder symptoms are frequently treated with antimuscarinics which target muscarinic receptors in the detrusor and urothelium<sup>51</sup>. Crucially, rodent bladder



urothelial cells do not express muscarinic receptors<sup>52</sup>. In the case of the HBEP and HBLAK tissue grown in this study, muscarinic receptors M2 and M3 were detected throughout the urothelial cell layers, further supporting its physiological relevance and potential use in the development of novel therapeutic agents for the bladder symptoms of MS and other neurogenic disorders.

More detailed analysis revealed several interesting aspects to our HBLAK organoid model. First, EM showed that the tissue was not homogenously differentiated; instead, the surface consisted of three discrete zones: ‘valleys’ of undifferentiated monolayer; ‘plateaus’ of fully differentiated 3D tissue; and ‘mountains’ of hyperplasia. Second, focusing on the plateaus, our EM imaging shows all the aspects expected from a human urothelium, including morphologically distinct layers, the enlarged flat nature of the distended umbrella cells, the characteristic hinges and plaques associated with the AUM, and the fusiform vesicles responsible for trafficking during bladder filling and emptying phases. Importantly, these key hallmarks were entirely absent from the zone of undifferentiated cells, showing a correlation with differentiation status. Third, inspection of GAG layer markers revealed that the presence of urine correlates with its elaboration, parallel to differentiation and organoid formation.

Intriguingly, when we tested the barrier function of the organoid by several methods, including transepithelial resistance and fluorescent dextran permeability (data not shown), we found a lack of what is traditionally thought of as urothelial “barrier function”. We presume that this result was caused by the sporadic presence of undifferentiated cells across the tissue, which in essence short-circuits the apicobasal electrical potential difference. This result, taken together with the fact that the non-differentiated zone devoid of AUM and GAG can grow for several weeks in the presence of urine, strongly suggests that AUM and GAG are not required for urine tolerance, and that something intrinsic in the cells themselves confer resistance to its toxic effects. It also suggests that apical urine is necessary for full differentiation. Whilst it may be the case that urine is not sufficient for differentiation, given the presence of the undifferentiated ‘valleys’, it may also be the case that a subset of HBLAK cells are subtly different. Further exploration into the nature of urine tolerance and the effect of urine and other media components on differentiation and hyperplasia are warranted. In the meantime, researchers performing image-based studies should be able to focus on areas of the organoid corresponding to their desired level of differentiation.

Sloughing of umbrella cells from the epithelial lining into the urine is known in both mice and humans to be a common response to infection<sup>68-72</sup>. In mouse model experiments, this dramatic cell shedding response leaves a gap in the epithelial layer, exposing naive transitional cells (proximal to the submucosal coat) to *de novo* uropathogenic *E. coli* (UPEC) invasion, a process which has been proposed, through an actin-gated pathway, to create quiescent intracellular reservoirs (QIR) responsible for latent recurrent and low-level chronic infection in mice<sup>26,71,73-76</sup>. Although QIR have not been observed in human patients, there is indirect evidence to suggest bacterial persistence in the human urothelium<sup>4,26,71,74,75,77,78</sup>. Data from human recurrent UTI demonstrate that 68% of bacteriological recurrence is caused by identical bacterial strains to that of the index infection<sup>4</sup>. Although it could be argued that these relapses are caused by reintroduction of pathogens from faecal flora<sup>79</sup>, same-strain infections can occur up to 3 years later<sup>78</sup> and the application of daily topical antibiotics to the perineum did not prevent recurrent episodes<sup>77</sup>. Further studies are needed to understand the long-term persistence of UTI pathogens in the host.

Our model shows great promise for studying the host/pathogen interactions of UTI in a human-cell system. We previously reported the discovery of intracellular colonies of *E. faecalis* harbored within the urothelial cells of chronic UTI patients<sup>38</sup>. In addition, the uropathogenic strains of *E. faecalis* isolated from these patients were able to invade a T24 bladder cell line<sup>38</sup>. This finding was echoed in our urothelial organoid, where *E. faecalis* formed significant intracellular colonies within the intermediate and basal cells of the urothelial mimetic after its umbrella-cell layer had been jettisoned. These results further support the notion that *E. faecalis* exhibits an intracellular phenotype.

In many murine studies, uropathogenic *E. coli* has been shown to invade urothelial cells as part of a well-described intracellular lifestyle<sup>26</sup>. As a result, it is now widely accepted that UPEC exhibits an intracellular phase in UTI patients. However, since the initial report of intracellular “pods” in the mouse model in 2003<sup>73</sup>, to our knowledge only four papers<sup>72 80 81 82</sup> have reported IBC in the shed cells of human UTI patients, only two of which (representing studies of one and 49 children respectively) deployed orthogonal analysis at the Z resolution necessary to minimise point spread function and pinpoint the bacteria to an intracellular compartment<sup>83 80,81</sup>. Another report has shown that UPEC isolated from women with acute cystitis were competent to form IBC in mice<sup>84</sup>, but this evidence is not direct

proof of their presence in the original patients. Hence, more studies on the universality of intracellular UPEC in human UTI would be welcomed.

In our model, the same strain of UPEC used for murine studies of IBC (UTI89) did not invade the cells of our human organoid, but instead formed dense biofilm covering a significant proportion of the organoid surface, which may be equally problematic for treatment. This result agrees with our previous work<sup>38</sup> which revealed superficial biofilms but again, no evidence for *E. coli* IBC. It is possible that the timings or other conditions of infection were not optimized for invasion with this strain of bacteria, and it remains a possibility that some requisite aspect of the host cell is absent in our model. In view of the significant differences between the human and rodent bladder, we propose that further studies in patients are required before concluding whether UPEC habitually invades human cells. On the other hand, if experimental conditions could be discovered that allowed UPEC to invade our organoid, the ease of creating tissue at various stages of differentiation would serve as an excellent model for understanding the creation, formation, and resolution of quiescent intracellular reservoirs, which up to this point have remained elusive in humans.

In conclusion, current advances in 3D tissue culture enabled us to grow physiologically relevant, organotypic human models of the bladder. Human bladder biomimetics could be used as a reproducible test bed for chronic infective disease formation, treatment, and resolution in humans.

## **Acknowledgements**

We thank the MS Society for their generous support of this work (grant ref. 986), Peter Girling for helpful discussion, and Anthony Kupelian for critical comments on the manuscript. We are also grateful to the Royal Free Electron Microscopy Unit for expert technical assistance.

## References

- 1 Foxman, B. Epidemiology of urinary tract infections: incidence, morbidity, and economic costs. *Disease-a-month : DM* 49, 53-70, doi:10.1067/mda.2003.7 (2003).
- 2 Foxman, B. The epidemiology of urinary tract infection. *Nature reviews. Urology* 7, 653-660, doi:10.1038/nrurol.2010.190 (2010).
- 3 WHO. Antimicrobial resistance: global report on surveillance 2014. (2014).
- 4 Russo, T. A., Stapleton, A., Wenderoth, S., Hooton, T. M. & Stamm, W. E. Chromosomal restriction fragment length polymorphism analysis of Escherichia coli strains causing recurrent urinary tract infections in young women. *The Journal of infectious diseases* 172, 440-445 (1995).
- 5 Laupland, K. B., Ross, T., Pitout, J. D., Church, D. L. & Gregson, D. B. Community-onset urinary tract infections: a population-based assessment. *Infection* 35, 150-153, doi:10.1007/s15010-007-6180-2 (2007).
- 6 Mahadeva, A., Tanasescu, R. & Gran, B. Urinary tract infections in multiple sclerosis: under-diagnosed and under-treated? A clinical audit at a large University Hospital. *American journal of clinical and experimental immunology* 3, 57-67 (2014).
- 7 Buljevac, D. Prospective study on the relationship between infections and multiple sclerosis exacerbations. *Brain : a journal of neurology* 125, 952 (2002).
- 8 Pannek, J. Treatment of urinary tract infection in persons with spinal cord injury: guidelines, evidence, and clinical practice: A questionnaire-based survey and review of the literature. *The journal of spinal cord medicine* 34, 11-15, doi:10.1179/107902610X12886261091839 (2011).
- 9 Giessing, M. Urinary tract infection in renal transplantation. *Arab Journal of Urology* 10, 162-168, doi:<http://dx.doi.org/10.1016/j.aju.2012.01.005> (2012).
- 10 Hooton, T. M. et al. Diagnosis, Prevention, and Treatment of Catheter-Associated Urinary Tract Infection in Adults: 2009 International Clinical Practice Guidelines from the Infectious Diseases Society of America. *Clinical Infectious Diseases* 50, 625-663, doi:10.1086/650482 (2010).
- 11 Schappert, S. M. & Rechtsteiner, E. A. Ambulatory medical care utilization estimates for 2007. *Vital and health statistics. Series 13, Data from the National Health Survey*, 1-38 (2011).
- 12 Cotter, M., Donlon, S., Roche, F., Byrne, H. & Fitzpatrick, F. Healthcare-associated infection in Irish long-term care facilities: results from the First National Prevalence Study. *Journal of Hospital Infection* 80, 212-216, doi:<https://doi.org/10.1016/j.jhin.2011.12.010> (2012).
- 13 Correale, J., Fiol, M. & Gilmore, W. The risk of relapses in multiple sclerosis during systemic infections. *Neurology* 67, 652-659, doi:10.1212/01.wnl.0000233834.09743.3b (2006).
- 14 Soliman, Y., Meyer, R. & Baum, N. Falls in the Elderly Secondary to Urinary Symptoms. *Reviews in Urology* 18, 28-32 (2016).
- 15 Lorenz, E. C. & Cosio, F. G. The impact of urinary tract infections in renal transplant recipients. *Kidney international* 78, 719-721, doi:10.1038/ki.2010.219 (2010).
- 16 Peach, B. C., Garvan, G. J., Garvan, C. S. & Cimiotti, J. P. Risk Factors for Urosepsis in Older Adults: A Systematic Review. *Gerontology and geriatric medicine* 2, 2333721416638980, doi:10.1177/2333721416638980 (2016).
- 17 Schieve, L. A., Handler, A., Hershow, R., Persky, V. & Davis, F. Urinary tract infection during pregnancy: its association with maternal morbidity and perinatal outcome. *American journal of public health* 84, 405-410 (1994).
- 18 Rosette, J. d. I. et al. Keratin Expression Profiling of Transitional Epithelium in the Painful Bladder Syndrome/Interstitial Cystitis. *American Journal of Clinical Pathology* 125, 105-110, doi:10.1309/w342bwmdmddbctvh (2006).

- 19 Khandelwal, P., Abraham, S. N. & Apodaca, G. Cell biology and physiology of the uroepithelium. *Am J Physiol-Renal* 297, F1477-F1501, doi:DOI 10.1152/ajprenal.00327.2009 (2009).
- 20 Chen, Y. R. *et al.* Rab27b is associated with fusiform vesicles and may be involved in targeting uroplakins to urothelial apical membranes. *Proceedings of the National Academy of Sciences of the United States of America* 100, 14012-14017, doi:DOI 10.1073/pnas.2436350100 (2003).
- 21 Wu, X. R., Kong, X. P., Pellicer, A., Kreibich, G. & Sun, T. T. Uroplakins in urothelial biology, function, and disease. *Kidney international* 75, 1153-1165, doi:10.1038/ki.2009.73 (2009).
- 22 Baker, S. C., Shabir, S. & Southgate, J. Biomimetic urothelial tissue models for the in vitro evaluation of barrier physiology and bladder drug efficacy. *Molecular pharmaceuticals* 11, 1964-1970, doi:10.1021/mp500065m (2014).
- 23 Cervigni, M. Interstitial cystitis/bladder pain syndrome and glycosaminoglycans replacement therapy. *Translational andrology and urology* 4, 638-642, doi:10.3978/j.issn.2223-4683.2015.11.04 (2015).
- 24 Janssen, D. A. W. *et al.* The Distribution and Function of Chondroitin Sulfate and Other Sulfated Glycosaminoglycans in the Human Bladder and Their Contribution to the Protective Bladder Barrier. *The Journal of urology* 189, 336-342, doi:<https://doi.org/10.1016/j.juro.2012.09.022> (2013).
- 25 Rübber, H., Friedrichs, R., Stuhlsatz, H. W., Cosma, S. & Lutzeyer, W. Quantitative analysis of glycosaminoglycans in urothelium and bladder wall of calf. *Urology* 22, 655-657, doi:[http://dx.doi.org/10.1016/0090-4295\(83\)90321-7](http://dx.doi.org/10.1016/0090-4295(83)90321-7) (1983).
- 26 Hunstad, D. A. & Justice, S. S. Intracellular lifestyles and immune evasion strategies of uropathogenic Escherichia coli. *Annual review of microbiology* 64, 203-221, doi:10.1146/annurev.micro.112408.134258 (2010).
- 27 Tian, W. *et al.* Utility of uroplakin II expression as a marker of urothelial carcinoma. *Human pathology* 46, 58-64, doi:10.1016/j.humpath.2014.09.007 (2015).
- 28 Craig, W. Relevance of animal models for clinical treatment. *Eur. J. Clin. Microbiol. Infect. Dis.* 12, S55-S57, doi:10.1007/BF02389879 (1993).
- 29 van der Worp, H. B. *et al.* Can Animal Models of Disease Reliably Inform Human Studies? *PLoS medicine* 7, e1000245, doi:10.1371/journal.pmed.1000245 (2010).
- 30 Perel, P. *et al.* Comparison of treatment effects between animal experiments and clinical trials: systematic review. *Bmj* 334, 197, doi:10.1136/bmj.39048.407928.BE (2007).
- 31 Bhogal, N. & Combes, R. The relevance of genetically altered mouse models of human disease. *Alternatives to laboratory animals : ATLA* 34, 429-454 (2006).
- 32 Lin, J. H. Applications and limitations of genetically modified mouse models in drug discovery and development. *Current drug metabolism* 9, 419-438 (2008).
- 33 Mordenti, J. Forecasting cephalosporin and monobactam antibiotic half-lives in humans from data collected in laboratory animals. *Antimicrobial agents and chemotherapy* 27, 887-891 (1985).
- 34 Wu, X. R., Manabe, M., Yu, J. & Sun, T. T. Large scale purification and immunolocalization of bovine uroplakins I, II, and III. Molecular markers of urothelial differentiation. *The Journal of biological chemistry* 265, 19170-19179 (1990).
- 35 Vaidyanathan, S. *et al.* A study of cytokeratin 20 immunostaining in the urothelium of neuropathic bladder of patients with spinal cord injury. *BMC urology* 2, 7 (2002).
- 36 Smith, N. J. *et al.* Toll-Like Receptor Responses of Normal Human Urothelial Cells to Bacterial Flagellin and Lipopolysaccharide. *The Journal of urology* 186, 1084-1092, doi:<http://dx.doi.org/10.1016/j.juro.2011.04.112> (2011).
- 37 Yang, P. J., Pham, J., Choo, J. & Hu, D. L. Duration of urination does not change with body size. *Proceedings of the National Academy of Sciences* 111, 11932-11937, doi:10.1073/pnas.1402289111 (2014).

- 38 Horsley, H. *et al.* Enterococcus faecalis subverts and invades the host urothelium in patients with chronic urinary tract infection. *PLoS One* 8, e83637, doi:10.1371/journal.pone.0083637 (2013).
- 39 Bubenik, J. *et al.* Established cell line of urinary bladder carcinoma (T24) containing tumour-specific antigen. *International journal of cancer. Journal international du cancer* 11, 765-773 (1973).
- 40 Georgopoulos, N. T. *et al.* Immortalisation of normal human urothelial cells compromises differentiation capacity. *European urology* 60, 141-149, doi:10.1016/j.eururo.2011.02.022 (2011).
- 41 Knowles, M. A., Finesilver, A., Harvey, A. E., Berry, R. J. & Hicks, R. M. Long-term organ culture of normal human bladder. *Cancer research* 43, 374-385 (1983).
- 42 Kreft, M. E., Sterle, M., Veranic, P. & Jezernik, K. Urothelial injuries and the early wound healing response: tight junctions and urothelial cytodifferentiation. *Histochemistry and cell biology* 123, 529-539, doi:10.1007/s00418-005-0770-9 (2005).
- 43 Feil, G. *et al.* Immunoreactivity of p63 in Monolayered and In Vitro Stratified Human Urothelial Cell Cultures Compared with Native Urothelial Tissue. *European urology* 53, 1066-1073, doi:<http://doi.org/10.1016/j.eururo.2007.10.026> (2008).
- 44 Nagele, U. *et al.* In vitro investigations of tissue-engineered multilayered urothelium established from bladder washings. *European urology* 54, 1414-1422, doi:10.1016/j.eururo.2008.01.072 (2008).
- 45 Sugasi, S. *et al.* In vitro engineering of human stratified urothelium: analysis of its morphology and function. *The Journal of urology* 164, 951-957 (2000).
- 46 Cross, W. R., Eardley, I., Leese, H. J. & Southgate, J. A biomimetic tissue from cultured normal human urothelial cells: analysis of physiological function. *American Journal of Physiology - Renal Physiology* 289, F459-F468, doi:10.1152/ajprenal.00040.2005 (2005).
- 47 Hertting, O. *et al.* Vitamin D induction of the human antimicrobial Peptide cathelicidin in the urinary bladder. *PLoS One* 5, e15580, doi:10.1371/journal.pone.0015580 (2010).
- 48 Kuhlmann, I. The prophylactic use of antibiotics in cell culture. *Cytotechnology* 19, 95-105, doi:10.1007/BF00749764 (1995).
- 49 Bajpai, R., Lesperance, J., Kim, M. & Terskikh, A. V. Efficient propagation of single cells Accutase-dissociated human embryonic stem cells. *Molecular reproduction and development* 75, 818-827, doi:10.1002/mrd.20809 (2008).
- 50 Schneider, C. A., Rasband, W. S. & Eliceiri, K. W. NIH Image to ImageJ: 25 years of image analysis. *Nat Meth* 9, 671-675 (2012).
- 51 Andersson, K. E. Current and future drugs for treatment of MS-associated bladder dysfunction. *Annals of Physical and Rehabilitation Medicine* 57, 321-328, doi:<http://dx.doi.org/10.1016/j.rehab.2014.05.009> (2014).
- 52 Saito, M., Nakamura, I. & Miyagawa, I. [Autoradiographic localization of muscarinic receptors in diabetic rat bladder]. *Nihon Hinyokika Gakkai zasshi. The japanese journal of urology* 88, 858-867 (1997).
- 53 Wu, X. R. *et al.* Mammalian uroplakins. A group of highly conserved urothelial differentiation-related membrane proteins. *The Journal of biological chemistry* 269, 13716-13724 (1994).
- 54 Lavelle, J. P., Apodaca, G., Meyers, S. A., Ruiz, W. G. & Zeidel, M. L. Disruption of guinea pig urinary bladder permeability barrier in noninfectious cystitis. *American Journal of Physiology - Renal Physiology* 274, F205-F214 (1998).
- 55 Liebhold, M., Wendt, M., Kaup, F. J. & Drommer, W. [Light- and electron-microscopic studies of the structure of normal bladder epithelium in female swine]. *Anatomia, histologia, embryologia* 24, 47-52 (1995).
- 56 Derganc, J., Božič, B. & Romih, R. Shapes of Discoid Intracellular Compartments with Small Relative Volumes. *PLoS ONE* 6, e26824, doi:10.1371/journal.pone.0026824 (2011).



- 57 Khasriya, R. *et al.* The spectrum of bacterial colonisation associated with urothelial cells from patients with chronic lower urinary tract symptoms. *J Clin Microbiol*, doi:JCM.03314-12 [pii];10.1128/JCM.03314-12 [doi] (2013).
- 58 Guiton, P. S., Hannan, T. J., Ford, B., Caparon, M. G. & Hultgren, S. J. Enterococcus faecalis overcomes foreign body-mediated inflammation to establish urinary tract infections. *Infection and immunity* 81, 329-339, doi:10.1128/IAI.00856-12 (2013).
- 59 Poulsen, L. L. *et al.* Enterococcus and Streptococcus spp. associated with chronic and self-medicated urinary tract infections in Vietnam. *BMC infectious diseases* 12, 320, doi:10.1186/1471-2334-12-320 (2012).
- 60 Mohamed, J. A. & Huang, D. B. Biofilm formation by enterococci. *Journal of medical microbiology* 56, 1581-1588, doi:10.1099/jmm.0.47331-0 (2007).
- 61 Felmingham, D., Wilson, A. P., Quintana, A. I. & Gruneberg, R. N. Enterococcus species in urinary tract infection. *Clinical infectious diseases : an official publication of the Infectious Diseases Society of America* 15, 295-301 (1992).
- 62 Hanin, A. *et al.* Screening of in vivo activated genes in Enterococcus faecalis during insect and mouse infections and growth in urine. *PLoS One* 5, e11879, doi:10.1371/journal.pone.0011879 (2010).
- 63 Nichol, K. A. *et al.* Molecular epidemiology of urinary tract isolates of vancomycin-resistant Enterococcus faecium from North America. *International journal of antimicrobial agents* 27, 392-396, doi:10.1016/j.ijantimicag.2005.12.006 (2006).
- 64 Swaminathan, S. & Alangaden, G. J. Treatment of resistant enterococcal urinary tract infections. *Current infectious disease reports* 12, 455-464, doi:10.1007/s11908-010-0138-8 (2010).
- 65 Bhadriaraju, K. & Chen, C. S. Engineering cellular microenvironments to improve cell-based drug testing. *Drug discovery today* 7, 612-620 (2002).
- 66 Knight, E. & Przyborski, S. Advances in 3D cell culture technologies enabling tissue-like structures to be created in vitro. *Journal of anatomy*, doi:10.1111/joa.12257 (2014).
- 67 Maqsood, M. I., Matin, M. M., Bahrami, A. R. & Ghasroldasht, M. M. Immortality of cell lines: challenges and advantages of establishment. *Cell biology international* 37, 1038-1045, doi:10.1002/cbin.10137 (2013).
- 68 Dalal, E. Moderate stress protects female mice against bacterial-infection of the bladder by eliciting uroepithelial shedding. *Infection and immunity* 62, 5505-5510 (1994).
- 69 Smith, Y. C., Rasmussen, S. B., Grande, K. K., Conran, R. M. & O'Brien, A. D. Hemolysin of uropathogenic Escherichia coli evokes extensive shedding of the uroepithelium and hemorrhage in bladder tissue within the first 24 hours after intraurethral inoculation of mice. *Infection and immunity* 76, 2978-2990, doi:Doi 10.1128/iai.00075-08 (2008).
- 70 Thumbikat, P. *et al.* Bacteria-induced uroplakin signaling mediates bladder response to infection. *PLoS pathogens* 5, e1000415, doi:10.1371/journal.ppat.1000415 (2009).
- 71 Hannan, T. J., Mysorekar, I. U., Hung, C. S., Isaacson-Schmid, M. L. & Hultgren, S. J. Early severe inflammatory responses to uropathogenic E. coli predispose to chronic and recurrent urinary tract infection. *PLoS pathogens* 6, e1001042, doi:10.1371/journal.ppat.1001042 (2010).
- 72 Rosen, D. A., Hooton, T. M., Stamm, W. E., Humphrey, P. A. & Hultgren, S. J. Detection of intracellular bacterial communities in human urinary tract infection. *PLoS medicine* 4, e329, doi:10.1371/journal.pmed.0040329 (2007).
- 73 Anderson, G. G. *et al.* Intracellular bacterial biofilm-like pods in urinary tract infections. *Science* 301, 105-107, doi:10.1126/science.1084550 (2003).
- 74 Anderson, G. G., Dodson, K. W., Hooton, T. M. & Hultgren, S. J. Intracellular bacterial communities of uropathogenic Escherichia coli in urinary tract pathogenesis. *Trends in microbiology* 12, 424-430, doi:10.1016/j.tim.2004.07.005 (2004).

- 75 Blango, M. G. & Mulvey, M. A. Persistence of uropathogenic *Escherichia coli* in the face of multiple antibiotics. *Antimicrobial agents and chemotherapy* 54, 1855-1863, doi:10.1128/AAC.00014-10 (2010).
- 76 Mysorekar, I. U. & Hultgren, S. J. Mechanisms of uropathogenic *Escherichia coli* persistence and eradication from the urinary tract. *Proceedings of the National Academy of Sciences of the United States of America* 103, 14170-14175, doi:10.1073/pnas.0602136103 (2006).
- 77 Cass, A. S. & Ireland, G. W. Antibacterial perineal washing for prevention of recurrent urinary tract infections. *Urology* 25, 492-494 (1985).
- 78 Brauner, A., Jacobson, S. H. & Kuhn, I. Urinary *Escherichia coli* causing recurrent infections - a prospective follow-up of biochemical phenotypes. *Clinical nephrology* 38, 318-323 (1992).
- 79 Hooton, T. M. Recurrent urinary tract infection in women. *International journal of antimicrobial agents* 17, 259-268 (2001).
- 80 Robino, L. *et al.* Detection of intracellular bacterial communities in a child with *Escherichia coli* recurrent urinary tract infections. *Pathogens and disease* 68, 78-81, doi:10.1111/2049-632x.12047 (2013).
- 81 Robino, L. *et al.* Intracellular bacteria in the pathogenesis of *Escherichia coli* urinary tract infection in children. *Clinical infectious diseases : an official publication of the Infectious Diseases Society of America* 59, e158-164, doi:10.1093/cid/ciu634 (2014).
- 82 Cheng, Y. *et al.* Detection of intracellular bacteria in exfoliated urothelial cells from women with urge incontinence. *Pathogens and disease* 74, doi:10.1093/femspd/ftw067 (2016).
- 83 Sa, Y. *et al.* WE-C-217BCD-05: A Novel Interpolation Method for the 3D Reconstruction of Cell Structures. *Medical physics* 39, 3950, doi:10.1118/1.4736121 (2012).
- 84 Garofalo, C. K. *et al.* *Escherichia coli* from urine of female patients with urinary tract infections is competent for intracellular bacterial community formation. *Infection and immunity* 75, 52-60, doi:Doi 10.1128/iai.01123-06 (2007).



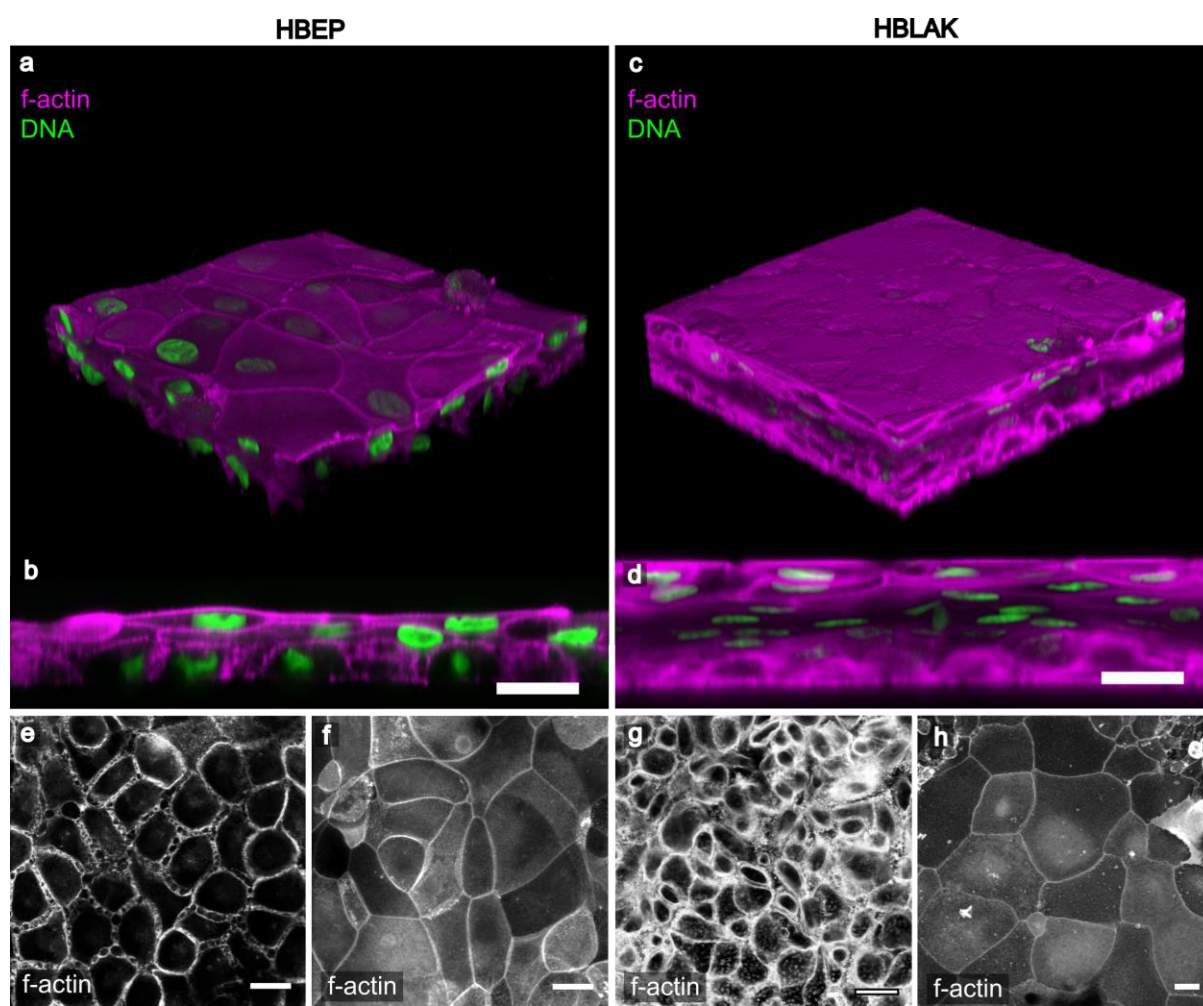

**Figure 1. HBLAK cells retain the ability to differentiate into 3D urothelial organoids.**

Upper Images are composites showing the phalloidin-stained F-actin in magenta and DAPI-stained DNA in green. Lower images show phalloidin-stained F-actin in monochrome. (a) 3D confocal model constructed from a 200 slice Z-stack of HBEP organoid. Umbrella cells are large and flat and frequently binucleated. (b) Orthogonal view of the Z-stack shows the tissue to be ~3 layers in depth and the basal cells to be spheroid in morphology. (c) 3D confocal model constructed from a ~300 slice Z-stack of HBLAK organoid. The HBLAK tissue is significantly better developed than the HBEP tissue in terms of thickness and number of cell layers. (d) Orthogonal reslice of the HBLAK tissue shows ~5-7 cell layers with, as above, cellular morphology comparable to native human tissue. (e) Single optical slice at lowest region of the HBEP organoid showing small tightly packed basal cells. (f) Single optical slice at apical region of HBEP organoid, showing well-differentiated, characteristically large umbrella cells. (g, h) Single optical slices of basal and umbrella cells respectively in HBLAK bladder bio-mimetic. Scale bars represent 20µm.

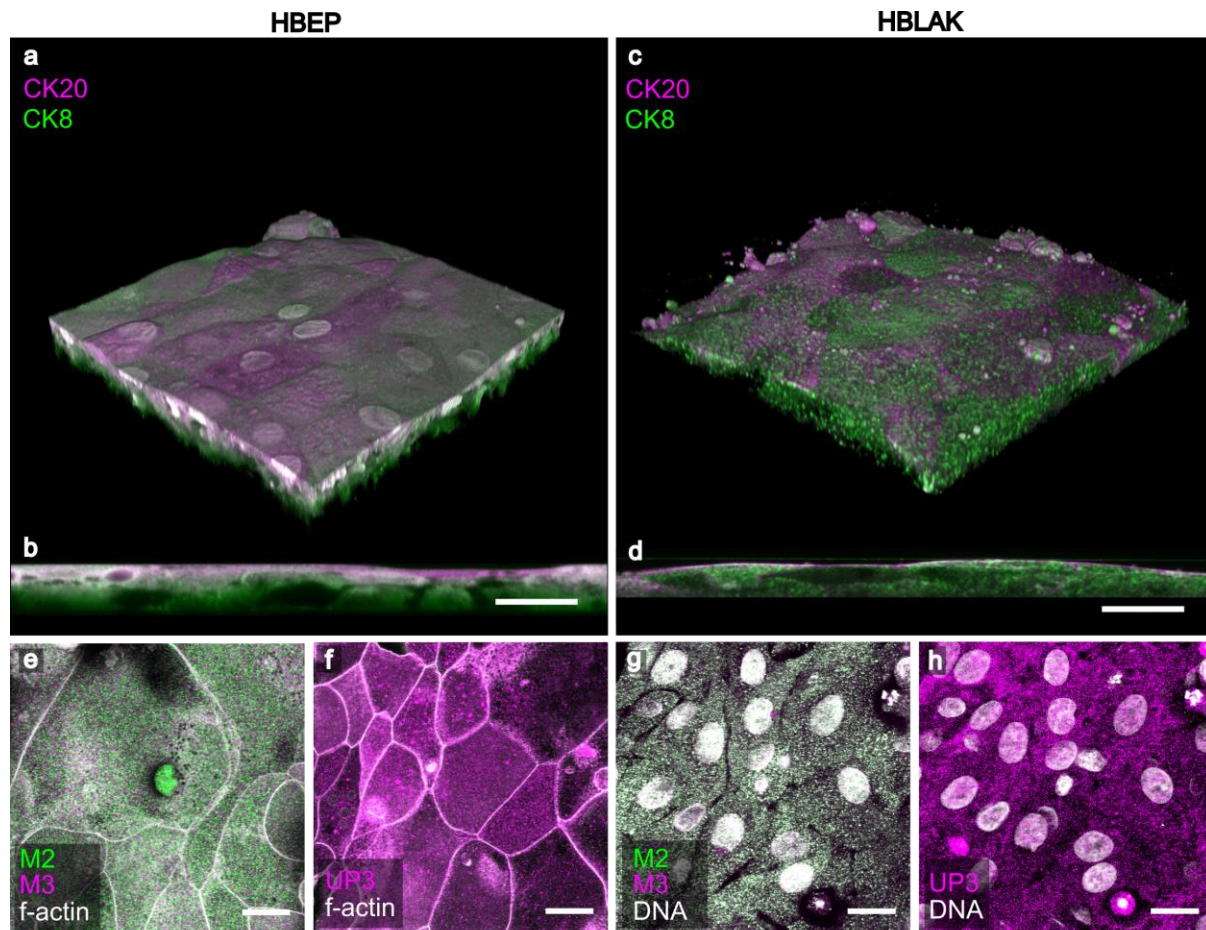

**Figure 2. Characterisation of HBEP (left) and HBLAK (right) urothelial organoids using IF**  
**(a, b)** 3D confocal model and orthogonal reslice from a 100 slice Z-stack of HBEP organoid. The HBEP organoid exhibited the correct spatial expression of Cytokeratin-20 (CK20, umbrella cells, magenta) and Cytokeratin-8 (CK8, throughout urothelium, green). **(c, d)** 3D confocal model and orthogonal reslice from a 120 slice Z-stack of HBLAK organoid. As with the primary HBEP mimetic, the HBLAK organoid also expressed CK20 (magenta) at the apical surface and CK8 (green) throughout the tissue. **(e)** Single optical slice at apical region of HBEP organoid, showing expression of Muscarinic receptor 2 (M2, green) and muscarinic receptor 3 (M3, magenta). Both receptors were found throughout the tissue. phalloidin-stained F-actin is presented in grey. **(f)** Single optical slice at apical region of HBEP organoid, showing expression of Uroplakin-III (UP3, magenta) by umbrella cells. phalloidin-stained F-actin is presented in grey. **(g)** Single optical slice at apical region of HBLAK organoid, showing expression of Muscarinic receptor 2 (M2, green) and muscarinic receptor 3 (M3, magenta). Both receptors were found throughout the HBLAK-derived tissue. DAPI-stained DNA is presented in grey. **(h)** Single optical slice at apical region of HBLAK organoid, showing expression of Uroplakin-III (UP3, magenta) by umbrella cells. phalloidin-stained F-actin is presented in grey. Scale bars represent 20µm.



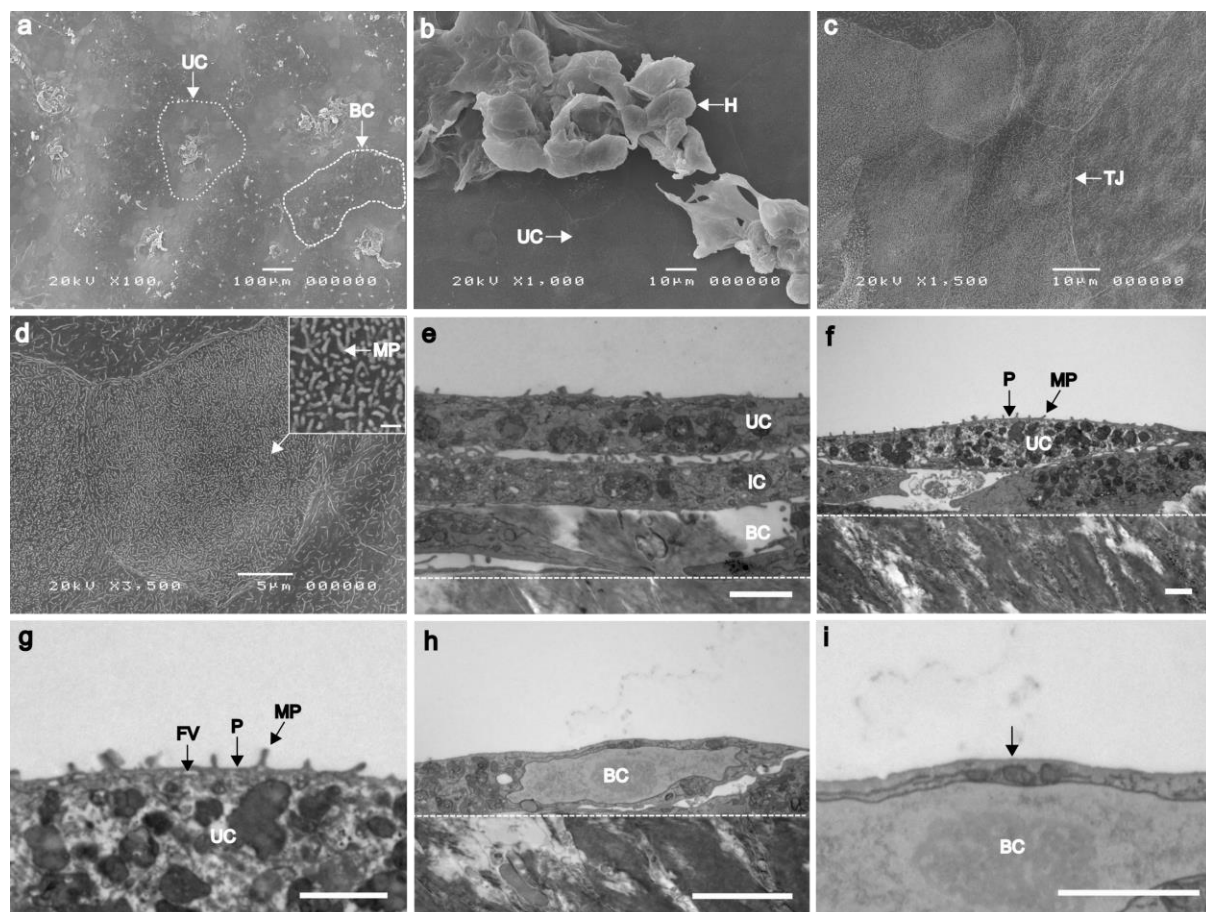

**Figure 3. Analysis of HBLAK organoid topography and ultrastructure using scanning electron microscopy (SEM) and transmission electron microscopy (TEM)**

(a) Low power SEM micrograph showing 'islands' of organoid formation. Umbrella cells (UC) can be seen at the apical surface of each 'island' interspersed by areas of undifferentiated monolayers of basal cells (BC). (b) SEM at the apical surface of organoid. Large (~50-60µm), flat hexagonal umbrella cells (UC) are present at the upper-most surface of each 'island'. Areas of hyperplasia (H), however, were frequently observed. (c) SEM of umbrella cells showing the formation of tight junctions (TJ). (d) SEM of a single umbrella cell. Characteristic Microvilli (MP) or 'hinges' can be seen covering the surface of the well-differentiated umbrella cells. Inset scale bar represents 500nm. (e) Orthogonal TEM image of 3-4 layered HBLAK organoid. Basal cells (BC) can be seen immediately above the polycarbonate culture filter (white broken line). Large, flat intermediate cells (IC) and umbrella cells (UC) are superior to the basal cells. Scale bar represents 2µm. (f) TEM of 2-3 cell thick HBLAK organoid. Rigid uroplakin-rich plaques (P) are present between the microvilli (MP) of the umbrella cell (UC). White broken line represents the upper surface of the polycarbonate culture filter. Scale bar represents 2µm. (g) High magnification TEM image of umbrella cell (UC) apical membrane. Rigid plaques (P) are situated between each hinge (microvilli, MP). Also present are fusiform vesicles (FV) which are responsible for trafficking uroplakin to the umbrella cell plaques. Scale bar represents 1µm. (h) TEM micrograph of a monolayer of undifferentiated basal cells (BC, as highlighted in image a) found between the organoid 'islands'. These non-differentiated cells measure ~8µm across, making them approximately ten times smaller than the fully differentiated umbrella cells in the same system. White broken line represents the upper surface of the polycarbonate culture filter. Scale bar represents 2µm. (i) High magnification TEM micrograph of the apical surface of the basal cell (BC) shown in image i. Microvilli, uroplakin plaques and fusiform vesicles are not seen (white arrow). Scale bar represents 1µm.



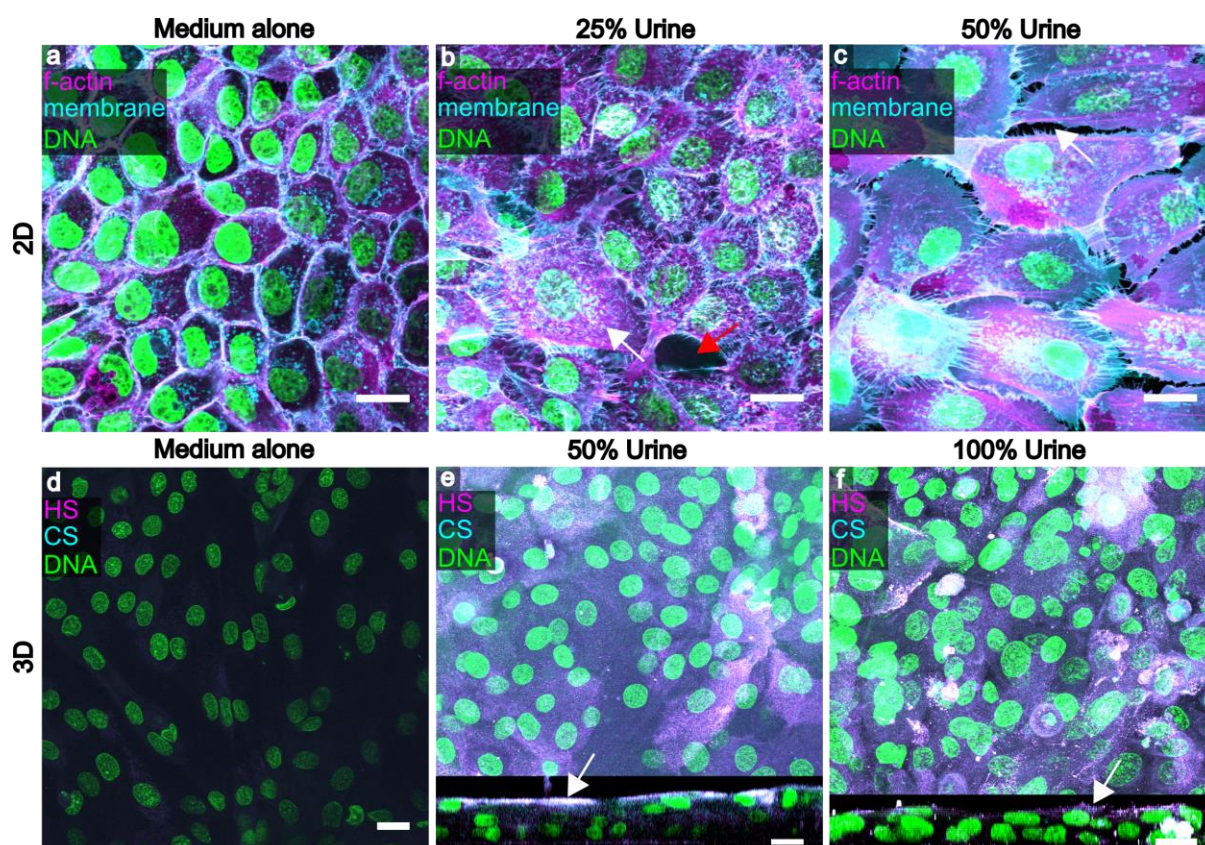

**Figure 4. Human urine affects HBLAK differentiation, 3D organoid formation and GAG expression.**

Upper Images are maximum projections from 12 slice Z-stacks of HBLAK cells cultured in 2D on labtek slides. Cells were grown to confluency and incubated for 72hrs in varying quantities of sterile human urine. WGA-stained plasma membrane is presented in cyan, phalloidin treated F-actin magenta and DAPI-labelled DNA green. (a) Untreated HBLAK monolayer grown in 3D barrier medium alone. Basal cell morphology was maintained and intercellular junctions appeared to be intact. (b) HBLAK monolayer cultured in medium diluted with 25% sterile human urine. A subset of cells began to differentiate (white arrow) and exhibit a large and flat umbrella cell-like morphology. Moreover, cell junction integrity was partially disrupted (red arrow). (c) HBLAK monolayer cultured in medium diluted with 50% sterile human urine. Large colonies of HBLAK cells exhibited an umbrella cell-like morphology. Cell junctions, however, were almost entirely compromised (white arrow). Lower images are maximum projections (and orthogonal reslices) from 20-slice Z-stacks of HBLAK cells grown on 3D culture filter inserts. Cultures were exposed to 3D barrier medium in the basal compartment and varying quantities of human urine at their apical surface for 14 days. The glycosaminoglycan (GAG) constituents heparan sulphate (HS) and chondroitin sulphate (CS) were labelled and are shown here in magenta and cyan respectively. DAPI-stained DNA is shown in green. (d) Cells cultured in 3D barrier medium only in the basal and apical compartments. No organoid formation was observed. Moreover, little GAG expression was seen. (e) Cells cultured in 3D barrier medium in the basal compartment and exposed to 50% urine at the apical surface. Organised urothelium-like organoids were formed. Heparan sulphate and chondroitin sulphate were strongly expressed by umbrella cells (orthogonal view, white arrow). White represents colocalization. (f) Cells cultured in 3D barrier medium in the basal compartment and exposed to 100% urine at the apical surface. Again, well organised bladder organoids were formed and a GAG (heparan sulphate and chondroitin sulphate) mucin layer was elaborated at the cell-urine interface (orthogonal view, white arrow). Scale bars represent 20µm.



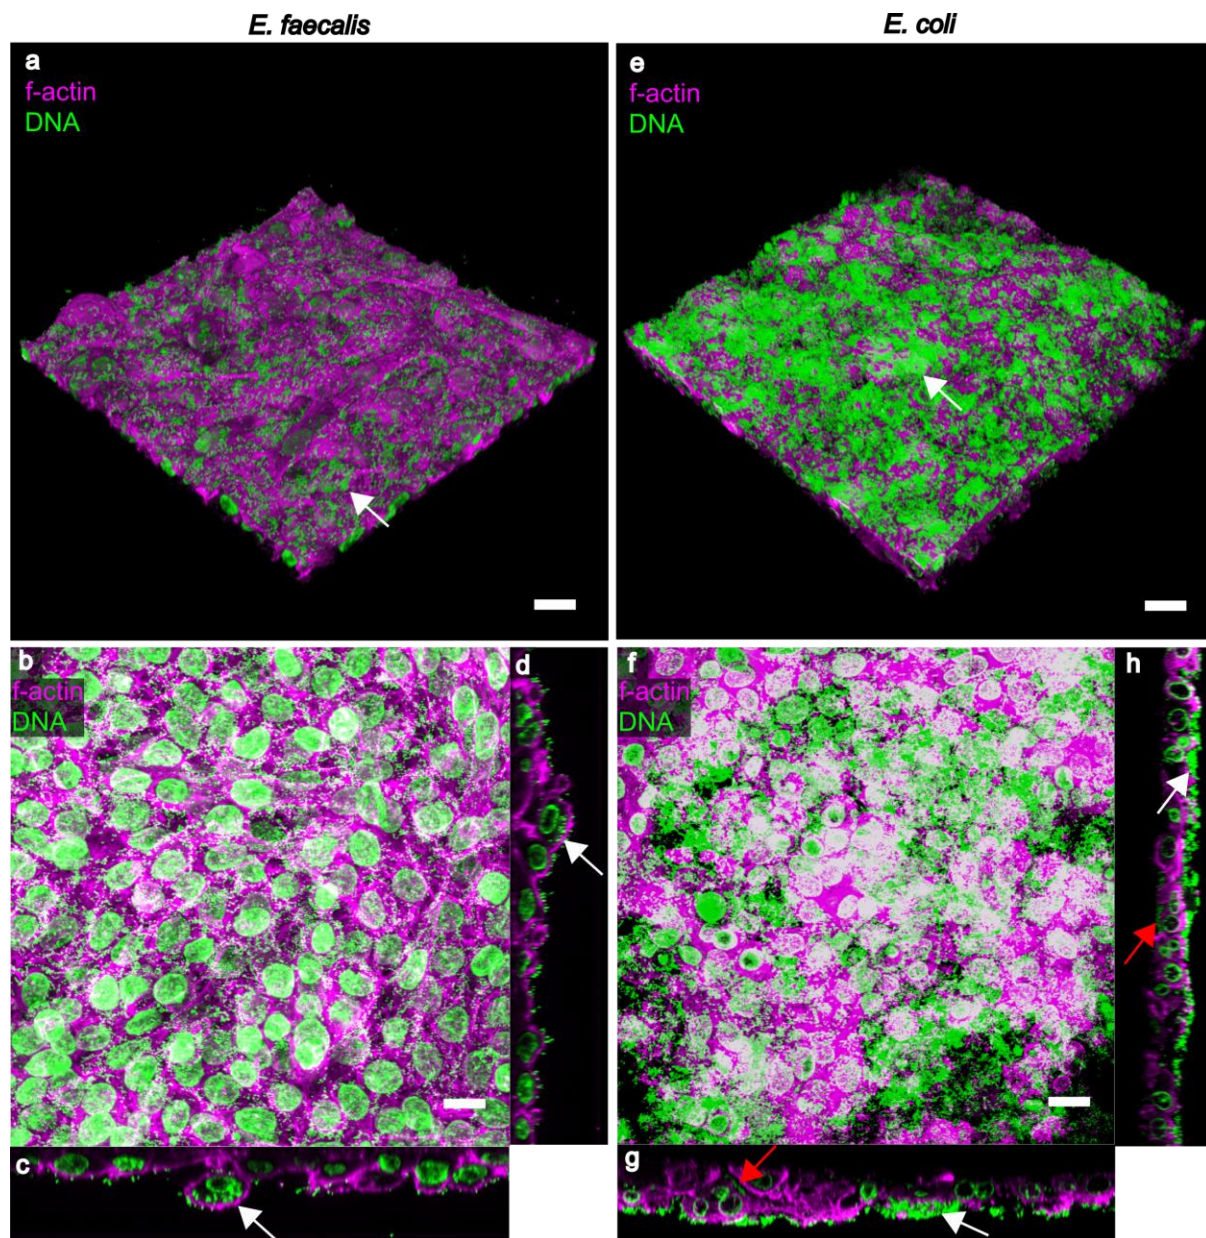

**Figure 5. 3D confocal analysis of HBLAK-derived urothelial organoid infected with uropathogenic *E. faecalis* and *E. coli*.**

Composites showing phalloidin-stained F-actin in magenta and DAPI-stained DNA (host and pathogen) in green. (a) 3D confocal model constructed from a 100 slice Z-stack of HBLAK organoid post infection with *E. faecalis*. The characteristically smooth and flat umbrella cell layer was lost in response to the infection. Loose colonies of *E. faecalis* can be seen adhering to the now unprotected basal and intermediate cells (white arrow). (b,c,d) Confocal maximum projection with X (c) and Y (d) orthogonal reslices of HBLAK organoid infected with *E. faecalis*. *E. faecalis* formed clear intracellular colonies within the intermediate cells (white arrows). (e) 3D confocal image of a 100 slice Z-stack of HBLAK organoid post infection with uropathogenic *E. coli*. Again, the protective umbrella cell layer was lost. The *E. coli* formed tightly packed biofilm-like colonies that covered a significant proportion of the organoid surface (white arrow). (f,g,h) Confocal maximum projection with X (g) and Y (h) orthogonal reslices of HBLAK organoid infected with *E. coli*. In contrast to *E. faecalis*, *E. coli* formed a deep surface biofilm (white arrows) but did not exhibit host cell invasion. Furthermore, cell shedding appeared to facilitate bacterial access to deeper tissue layers where it can be seen residing between basal and intermediate cells (red arrows). Scale bars represent 20µm.
